# Supplementary material for: The earliest toothless hominin skull
Source: Springer Nature journal article supplement (doi:10.1038/434717b), 2005-04-01
Supplement: 41586_2005_BF434717b_MOESM1_ESM.pdf [file 41586_2005_BF434717b_MOESM1_ESM.pdf]

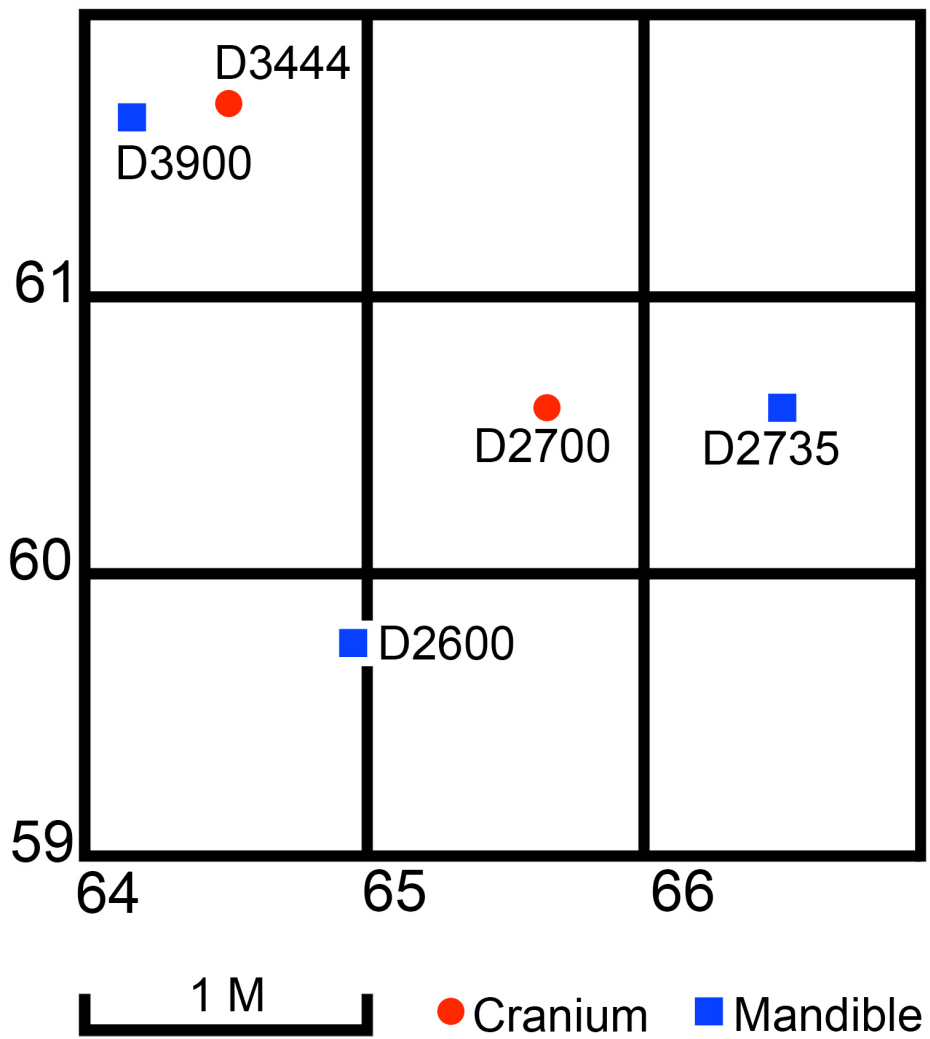

**Supplementary Figure 1.** Location map of Dmanisi hominin fossils from excavation Block 2. Excavation units are 1m-squares.
